# Supplementary material for: IL-31-Driven Skin Remodeling Involves Epidermal Cell Proliferation and Thickening That Lead to Impaired Skin-Barrier Function
Source: PLOS journal article supplement (doi:10.1371/journal.pone.0161877), 2016-08-24

## Supporting Information

**S1 Fig. Limited effect of administration of rIL-31 on the increase in dermal thickness induced by IL-31.** C57BL/6 mice were injected intradermally with saline as control and recombinant IL-31 (rIL-31; 20  $\mu$ g per injection) daily, for 14 days. A portion of dorsal skin was excised and fixed in 10% buffered formalin, paraffin-embedded, and used for H&E staining. Dermal thickness was measured using MetaMorph Image analysis software. Data is cumulative of three independent experiments, total numbers of mice in each group were 8-13, and represented as mean  $\pm$  SEM. An unpaired Student's *t*-test was used to measure the significant difference between the groups.

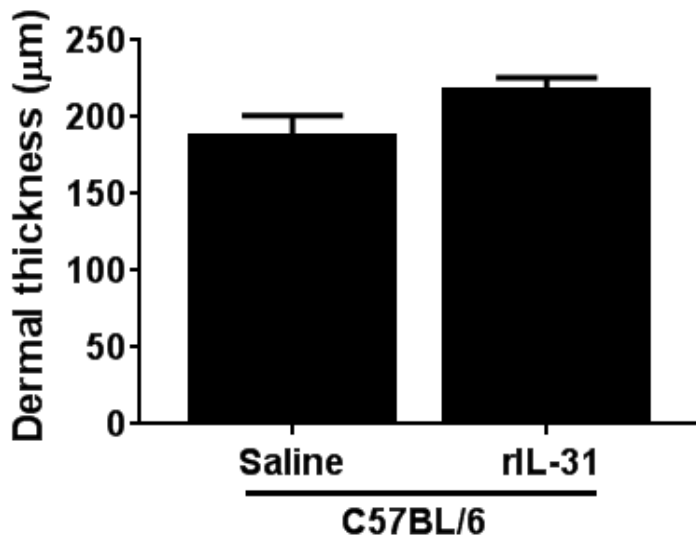

Supplement: S1 (10.1371/journal.pone.0161877.s001) [file journal.pone.0161877.s001]
